# Supplementary material for: A tailored approach towards informing relatives at risk of inherited cardiac conditions: study protocol for a randomised controlled trial
Source: PubMed Central journal article supplement (PMC6615798; doi:10.1136/bmjopen-2018-025660), 2019-07-09
Supplement: bmjopen-2018-025660supp002.pdf [file bmjopen-2018-025660supp002.pdf]

**Supplementary material S2:** Overview of questionnaire items to assess secondary outcomes per time-point

**Table 1** Questionnaire items probands per time-point

| Questionnaire time-point | Items                                                                                                                                                                 | Questionnaires                                                             |
|--------------------------|-----------------------------------------------------------------------------------------------------------------------------------------------------------------------|----------------------------------------------------------------------------|
| T1                       | Sociodemographic, clinical, family and personality factors                                                                                                            | Self-constructed items<br>Trait scale of STAI<br>Shortened version of TMSI |
|                          | Advices for relatives at risk, eligible relatives at risk, the number of informed relatives at risk, risk perception and experiences with informing relatives at risk | Eleven self-constructed items                                              |
|                          | Evaluation of used approach (incl. website)                                                                                                                           | Thirteen self-constructed items                                            |
|                          | Perceived impact on family communication with relatives at risk                                                                                                       | Adapted version of ODCF<br>One self-constructed item                       |
|                          | Impact on psychological functioning of proband                                                                                                                        | HADS<br><br>Adapted version of CWS                                         |
| T2                       | Number of informed relatives at risk, risk perception and experiences with informing relatives at risk                                                                | Three self-constructed items                                               |
|                          | Evaluation of approach used                                                                                                                                           | One self-constructed item                                                  |
|                          | Perceived impact on family communication with relatives at risk                                                                                                       | Adapted version of ODCF<br>One self-constructed item                       |
|                          | Impact on psychological functioning of proband                                                                                                                        | HADS<br>Adapted version of CWS                                             |

**Table 2** Questionnaire items relatives

| Questionnaire time-point | Items                                                        | Questionnaires                                                                   |
|--------------------------|--------------------------------------------------------------|----------------------------------------------------------------------------------|
| T1                       | Sociodemographic, family and personality factors             | Eight self-constructed items<br>Trait scale of STAI<br>Shortened version of TMSI |
|                          | Evaluation of used approach (incl. website), risk perception | Thirteen self-constructed items                                                  |
|                          | Perceived impact on family communication with index patient  | Adapted version of ODCF<br>One self-constructed item                             |
|                          | Impact on psychological functioning of family member         | HADS<br>Adapted version of CWS                                                   |

**Table 3** Self-constructed items (telephone interview) - Experiences with informing relatives at risk (probands)

|                                                                      |        |
|----------------------------------------------------------------------|--------|
| 1. Did the genetic counsellor give you an advice for your relatives? | Yes/No |
| 2. What was this advice? (open question)                             |        |
| 3. For which relatives was this advice meant? (open question)        |        |

Supplementary Material S2

|                                                                                                                                                                    |        |
|--------------------------------------------------------------------------------------------------------------------------------------------------------------------|--------|
| 4. Have relatives at risk been informed about the advice of the genetic counsellor? If yes, which relatives have been informed?<br>5. Who informed your relatives? | Yes/No |
|--------------------------------------------------------------------------------------------------------------------------------------------------------------------|--------|

**Table 4** Self-constructed items (telephone interview) - Risk perception (probands)

|                                                                                               |                   |
|-----------------------------------------------------------------------------------------------|-------------------|
| 1. How do you consider the risk of your relatives on being a carrier of the familial variant? | 0% - 100%<br>1-10 |
| 2. How do you estimate the risk of your relatives on developing symptoms of the ICC?          | 0% - 100%<br>1-10 |

**Table 5** Self-constructed items - Evaluation of the used approach (probands)

|              |                                                                                                                                                                                                                                                                                                                                                                                                                                                                                                                                                                                                                                                      |                                                                                      |
|--------------|------------------------------------------------------------------------------------------------------------------------------------------------------------------------------------------------------------------------------------------------------------------------------------------------------------------------------------------------------------------------------------------------------------------------------------------------------------------------------------------------------------------------------------------------------------------------------------------------------------------------------------------------------|--------------------------------------------------------------------------------------|
| <i>T1</i>    | <p><i>Closed questions</i></p> <p><i>Below you can see statements regarding your experiences with how your relatives have been informed. Please rate each statement on a scale of 1-5 (1 totally disagree to 5 totally agree) how much each statement applies to you.</i></p> <p>1. I feel supported by the genetic counsellor in informing my relatives</p> <p>2. I think the used approach to inform relatives at risk is acceptable</p> <p>3. I felt a little coerced to inform my relatives</p> <p>4. The way my relatives are informed, can be improved</p> <p>5. I am satisfied with the way my relatives are informed</p> <p>Other: _____</p> | <p>1 2 3 4 5</p> |
| <i>T2</i>    | <p>1. Did your opinion regarding the used approach change?</p> <p>a. Yes, my opinion regarding the used approach became more positive</p> <p>b. Yes, my opinion regarding the used approach became more negative</p> <p>c. No, my opinion regarding the used approach is still positive</p> <p>d. No, my opinion regarding the used approach is still negative</p> <p>e. No, my opinion regarding the used approach is still neutral</p>                                                                                                                                                                                                             |                                                                                      |
| <i>T1/T2</i> | <p>1. Do you think another approach to inform relatives at risk would have been better?</p> <p>2. Are there relatives for which you would have preferred another approach to inform them?</p>                                                                                                                                                                                                                                                                                                                                                                                                                                                        | <p>Yes/No</p> <p>Yes/No</p>                                                          |
| <i>T1/T2</i> | <p><i>Open questions</i></p> <p>1. What are advantages of the approach used to inform your relatives?</p> <p>2. What are disadvantages of the approach used to inform your relatives?</p>                                                                                                                                                                                                                                                                                                                                                                                                                                                            |                                                                                      |

**Table 6** Self-constructed items - Impact on family relationships (probands)

|                                                                                                                                           |
|-------------------------------------------------------------------------------------------------------------------------------------------|
| 1. Are there relatives with whom your relationship has changed after they are informed about their risk on the inherited cardiac disease? |
|-------------------------------------------------------------------------------------------------------------------------------------------|

Supplementary Material S2

- |                                                                                                                                                                                                                                                                                        |
|----------------------------------------------------------------------------------------------------------------------------------------------------------------------------------------------------------------------------------------------------------------------------------------|
| <ul style="list-style-type: none"> <li>a. Yes, our relationship improved</li> <li>b. Yes, our relationship worsened</li> <li>c. No, our relationship is still not good/not bad</li> <li>d. No, our relationship is still good</li> <li>e. No, our relationship is still bad</li> </ul> |
|----------------------------------------------------------------------------------------------------------------------------------------------------------------------------------------------------------------------------------------------------------------------------------------|

**Table 7** Self-constructed items - Evaluation of the used approach (relatives)

|                                                                                                                                                                                                                                                                                                                                                                                                                   |           |
|-------------------------------------------------------------------------------------------------------------------------------------------------------------------------------------------------------------------------------------------------------------------------------------------------------------------------------------------------------------------------------------------------------------------|-----------|
| <i>Closed questions</i>                                                                                                                                                                                                                                                                                                                                                                                           |           |
| 1. How were you informed about the hereditary predisposition in your family?                                                                                                                                                                                                                                                                                                                                      |           |
| <ul style="list-style-type: none"> <li>a. With an information letter from the hospital, received from a relative</li> <li>b. With a letter written by a relative</li> <li>c. In person by a relative</li> <li>d. With an information letter from the hospital, received from a genetic counsellor/clinical geneticist</li> <li>e. In person by a genetic counsellor/clinical geneticist</li> </ul>                |           |
| 2. What information did you receive (multiple answers are possible)?                                                                                                                                                                                                                                                                                                                                              |           |
| <ul style="list-style-type: none"> <li>a. The risk to be a carrier of the hereditary predisposition for the inherited cardiac disease in my family</li> <li>b. The possibility to make an appointment for predictive DNA testing at an outpatient clinic Clinical Genetics</li> <li>c. The advice to be regularly monitored by a cardiologist in the hospital</li> <li>d. Something else, namely _____</li> </ul> |           |
| -----                                                                                                                                                                                                                                                                                                                                                                                                             |           |
| <i>Below you can see statements regarding your experiences with how you have been informed about the inherited cardiac disease in your family. Please rate each statement on a scale of 1-5 (1 totally disagree to 5 totally agree) how much each statement applies to you.</i>                                                                                                                                   |           |
| 1. I appreciated to be informed about my risk on the inherited cardiac disease                                                                                                                                                                                                                                                                                                                                    | 1 2 3 4 5 |
| 2. I am satisfied with the way I have been informed                                                                                                                                                                                                                                                                                                                                                               | 1 2 3 4 5 |
| 3. I preferred to have received more information before I contacted the clinical genetic centre                                                                                                                                                                                                                                                                                                                   | 1 2 3 4 5 |
| 4. I understand why I have been informed                                                                                                                                                                                                                                                                                                                                                                          | 1 2 3 4 5 |
| 5. The way I have been informed, can be improved                                                                                                                                                                                                                                                                                                                                                                  | 1 2 3 4 5 |
| 6. I felt free to decide myself whether I wanted to contact the clinic genetic centre                                                                                                                                                                                                                                                                                                                             | 1 2 3 4 5 |
| 7. I would have preferred not to be informed about my risk on the inherited cardiac disease in my family                                                                                                                                                                                                                                                                                                          | 1 2 3 4 5 |
| 8. I would have preferred to not know about the inherited cardiac disease in my family                                                                                                                                                                                                                                                                                                                            | 1 2 3 4 5 |
| Other: _____                                                                                                                                                                                                                                                                                                                                                                                                      |           |
| -----                                                                                                                                                                                                                                                                                                                                                                                                             |           |
| 1. Do you think another approach to be informed would have been better?                                                                                                                                                                                                                                                                                                                                           | Yes/No    |
| -----                                                                                                                                                                                                                                                                                                                                                                                                             |           |
| <i>Open questions</i>                                                                                                                                                                                                                                                                                                                                                                                             |           |

## Supplementary Material S2

|                                                              |  |
|--------------------------------------------------------------|--|
| 1. What are advantages of the way you have been informed?    |  |
| 2. What are disadvantages of the way you have been informed? |  |

**Table 8** Self-constructed items - Impact on family relationships (relatives)

|                                                                                                                                                                                                                                                                                                                                                                                                                 |
|-----------------------------------------------------------------------------------------------------------------------------------------------------------------------------------------------------------------------------------------------------------------------------------------------------------------------------------------------------------------------------------------------------------------|
| 1. Did your relationship with your relative change after they were informed about their risk on the inherited cardiac disease? <ol style="list-style-type: none"><li>a. Yes, our relationship improved</li><li>b. Yes, our relationship worsened</li><li>c. No, our relationship is still not good/not bad</li><li>d. No, our relationship is still good</li><li>e. No, our relationship is still bad</li></ol> |
|-----------------------------------------------------------------------------------------------------------------------------------------------------------------------------------------------------------------------------------------------------------------------------------------------------------------------------------------------------------------------------------------------------------------|
